# Supplementary material for: Neuroprotective Effects of Soy Isoflavones on Scopolamine-Induced Amnesia in Mice
Source: PubMed Central journal article supplement (PMC6073222; doi:10.3390/nu10070853), 2018-06-30

A1

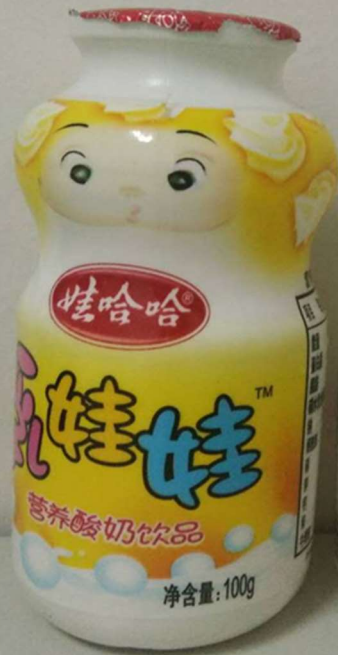

A2

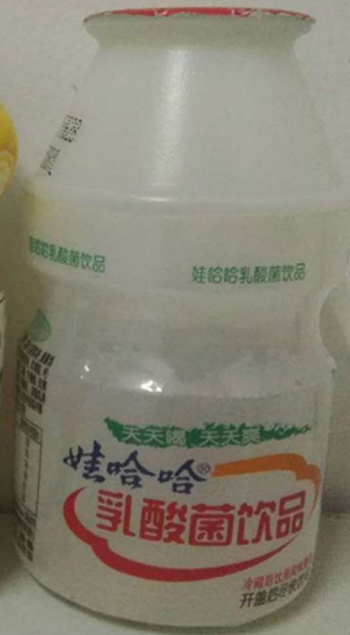

Supplement: nutrients-10-00853-s001.pdf [file nutrients-10-00853-s001.pdf]
